# Supplementary material
Source: publisher figshare collection journal article supplement (https://gsajournals.figshare.com/ndownloader/files/18726509)
Supplement: Supplementary file 1 [file 18726509]

## Sheet: Marker Positions
Supplemental Table S3. Genomic locations of map markers, as determined by gmap. The position and percent identity between marker and genome is listed.
					G. hirsutum			G. raimondii			G. arboreum
AZ LG	AZ Map Position (cM)	IA LG	IA Map Position (cM)	Marker	Chr	Genome Position	% ID	Chr	Genome Position	% ID	Chr	Genome Position	% ID
AZ01	0	IA02	70.235	c2_34964	A12	785478	100	Chr08	787225	94	Chr12	102266110	99
AZ01	19.454	IA02	36.327	c4_13563	A12	3183212	99	Chr08	2724694	96	---	---	---
AZ01	32.864	IA02	19.686	c4_49399	A12	7834354	97	Chr08	3714704	97	---	---	---
AZ01	40.719	IA01*	0	c3_76188	A12	13521801	99	---	---	---	Chr12	93506552	85
AZ01	42.847	IA02	3.354	EST1A_00152_58.817_Cotton16_00152_01	D12	39795319	99	Chr08	34732046	98	Chr12	31172453	98
AZ01	45.56	IA02	0	c4_02426	A12	36793765	100	Chr06	28513560	90	Chr04	37533684	92
AZ01	46.335	IA02	1.379	c4_36660	A12	28153303	98	Chr13	37305805	89	Chr12	73523828	97
AZ01	49.577	---	---	c2_11637	A12	26492774	100	Chr10	36076251	80	Chr12	80857716	98
AZ01	61.554	IA01*	0.9	GS2D_22731p558q11	A12	78273367	99	Chr08	38767588	99	Chr12	25899834	99
AZ03	0	IA01	28.404	GS2A_37259p664q5	A12	89388596	99	Chr08	46305943	100	Chr12	13986378	100
AZ03	1.194	IA01	28.405	GS2A_2514p880q5	A12	90714057	100	Chr08	47151625	99	Chr12	12702389	100
AZ03	1.328	---	---	c3_13858	A12	100079948	100	Chr08	54535057	100	Chr12	2679230	100
AZ03	15.771	IA01	45.326	c4_63363	A12	97753090	97	Chr08	52624475	72	Chr12	4986378	95
AZ03	26.415	IA01	66.425	GS1A_35252p459q21	A12	99969672	100	Chr08	54411563	100	Chr12	2790591	100
AZ02	0	IA03	22.758	c2_04522	D12	33038902	100	Chr08	29047907	97	Chr12	45122263	89
AZ02	0.321	IA03	36.391	c4_05109	D12	22239698	100	Chr08	20577722	94	Chr13	115163904	80
AZ02	0.549	IA03	35.882	c4_09140	D12	37238984	100	Chr08	32334805	97	Chr12	36239840	81
AZ02	6.132	IA03	17.422	ck_08344	D12	42748162	99	Chr08	37489882	98	Chr10	104861620	100
AZ02	13.023	IA03	10.653	ck_02331	D12	45583702	100	Chr08	40093349	98	Chr12	24054078	95
AZ02	19.296	IA03	0	GS2A_45293p258q9	D12	51612631	100	Chr08	45864648	100	Chr12	14636059	100
AZ02	21.275	IA03	49.655	c4_23726	D12	50419729	96	Chr08	44750810	92	Chr04	13427192	100
AZ02	48	---	---	EST1D_27871_01	A11	23578634	99	Chr07	17458630	82	Chr11	100179620	100
AZ04	0	IA37	0	c4_41113	D12	61838133	98	Chr08	55275400	95	Chr13	26818629	88
AZ04	4.758	IA37	17.142	GS2A_7310p1793q4A	A12	101355435	97	Chr08	55732644	99	Chr12	1459916	97
AZ05	0	IA06	2.368	GS1A_19003p436q20	A06	11844977	100	Chr10	8884782	100	Chr06	10073908	100
AZ05	1.716	IA06	2.99	c2_22447	A06	13973378	98	Chr09	34659015	89	Chr06	22644076	95
AZ05	2.08	IA06	2.954	c3_86518	A06	15265044	100	Chr11	10861174	90	Chr06	24367109	98
AZ05	2.68	IA06	14.37	c4_48216	A06	15303816	99	Chr05	25332984	87	Chr06	14575779	84
AZ05	5.711	IA06	0	GS1A_14865p560q19	A06	17155477	100	Chr10	11780102	100	Chr06	12336851	100
AZ05	16.824	IA06	22.885	c4_14575	A06	42832727	100	Chr02	27406644	87	Chr06	46653065	98
AZ05	17.826	IA06	24.488	c4_07635	A06	96619390	100	Chr08	15549077	85	Chr06	99305741	97
AZ05	18.088	IA06	24.647	c4_16762	A06	103545557	99	Chr07	25779811	90	Chr06	110341713	99
AZ05	18.489	IA06	11.134	c2_56561	A06	100611378	99	Chr10	47813513	94	Chr06	108341264	98
AZ05	28.983	IA06	35.931	c4_57424	A06	115444817	100	Chr06	20247493	89	Chr06	124741570	96
AZ05	31.073	IA06	33.657	c4_09782	A06	115638266	100	Chr04	21418532	94	Chr06	124950069	99
AZ05	34.361	IA06	42.639	EST1A_46071_01	D06	64191155	100	Chr10	58370289	99	Chr06	126476773	95
AZ05	60	IA06	74.049	GS2D_39816p508q23	A06	120457031	100	Chr10	60943668	100	Chr06	130355829	100
AZ05	67.453	IA06	80.756	c2_17305	A06	121378180	99	---	---	---	Chr06	129972737	96
AZ05	76.44	IA06	77.435	GS2A_37928p339q7	A06	120553658	100	Chr10	61045827	100	Chr06	130251785	100
AZ06	0	IA16	37.117	c2_48932	A05	93492954	99	Chr12	5446039	94	Chr04	91668465	98
AZ06	0.817	IA16	37.117	c3_40633	A05	93933072	99	Chr12	5317469	93	Chr10	19516347	99
AZ06	14.61	IA16	17.408	cs_1021	A05	71772757	98	Chr08	4495321	78	Chr05	81653605	97
AZ06	15.705	IA16	20.048	c2_31256	A05	82328431	99	Chr12	16566976	93	Chr04	73390467	99
AZ06	16.636	IA16	3.293	c4_15623	A05	59620032	99	Chr12	11745800	87	Chr04	14002824	85
AZ06	17.201	IA16	2.785	c4_49539	A05	55523714	99	Chr05	42038331	88	Chr05	77860739	98
AZ06	17.333	IA16	2.544	c4_56616	A05	72004526	100	Chr01	38346207	84	Chr05	82014150	97
AZ06	17.338	IA16	2.721	c4_06920	A05	72148828	99	Chr09	45074795	92	Chr05	82183484	98
AZ06	17.492	IA16	17.798	c3_58090	A05	66257159	99	---	---	---	Chr05	75028129	97
AZ06	17.831	IA16	21.25	c2_114307	D11	1055911	100	Chr07	1021401	98	Chr11	123318827	95
AZ06	18.069	IA16	1.947	c4_40214	A05	48113965	99	Chr09	34239862	89	Chr05	49843225	97
AZ06	18.887	IA16	0	c4_12480	A05	85345831	99	Chr12	10600548	93	Chr04	83754606	99
AZ06	23.241	IA16	8.166	c4_17535	A05	38030203	99	Chr07	36451426	88	Chr05	38027097	98
AZ06	30.76	IA16	29.06	GS2A_48587p409q3	A05	32455072	100	Chr09	25326541	100	Chr05	31951255	100
AZ07	0	IA25	124.421	EST1D_31942_01_643	D11	72873302	99	Chr07	60623770	98	Chr11	446406	95
AZ07	18.016	IA25	102.841	GS2D_55913p499q20	D11	70026154	99	Chr07	58257923	100	Chr11	4086468	97
AZ07	38.758	IA25	87.414	ck_36210	---	---	---	Chr07	53145325	97	---	---	---
AZ07	49.733	IA25	76.953	GS1D_16639p444q33	D11	62089900	96	Chr07	51387156	97	Chr11	14136735	100
AZ07	63.143	IA25	66.87	c3_11416	D11	50841706	98	Chr03	40289249	80	Chr07	92828710	82
AZ07	63.299	IA25	45.807	c4_06564	D11	40751769	100	Chr02	29245110	97	Chr11	52374585	86
AZ07	63.808	IA25	46.746	c4_41050	D11	51433613	99	Chr07	41634871	98	Chr09	1809643	82
AZ07	65.774	IA25	45.346	c4_00602	D11	37874929	98	Chr07	32386688	96	Chr09	1088032	91
AZ07	73.54	IA25	58.596	GS2D_41103p205q20	D11	20781578	99	Chr07	19177165	99	Chr11	99065430	99
AZ07	83.357	IA25	22.824	c4_18678	D11	16210907	97	Chr07	14823194	76	Chr11	105466210	63
AZ07	99.26	IA25	1.49	c4_13985	D11	10421827	99	Chr07	9356240	99	Chr11	113267928	96
AZ07	104.796	IA25	0	c4_38231	D11	7839868	98	Chr07	7103943	98	Chr11	116282348	95
AZ08	0	---	---	c2_01304	A05	77952851	99	Chr01	45211845	91	Chr04	77567275	98
AZ08	1.861	IA26	26.822	GS1_39607p88q23	A11	1912510	100	Chr07	1638251	100	Chr11	122639008	100
AZ08	16.359	IA26	0	EST1D_07319_01_230	A11	4371131	97	Chr07	3920709	96	Chr11	119879303	97
AZ09	0	---	---	EST2_18036_01	D08	2309559	98	Chr04	1573634	96	Chr08	1793639	87
AZ09	16.699	IA04	0	ck_03436	D08	4206266	98	Chr04	3656240	95	Chr08	4051521	91
AZ09	20.341	IA04	4.228	GS1D_51879p342q31	D08	5025252	99	Chr04	4246093	99	Chr08	4681823	100
AZ09	28.789	IA04	23.783	c2_04080	D08	13256767	100	Chr04	11909027	98	Chr08	123081140	88
AZ09	33.144	IA04	29.048	c4_56022	D08	40732098	99	Chr04	34843141	97	Chr01	78797533	78
AZ09	48.852	IA04	41.318	c4_14095	D08	58120157	99	Chr04	51475714	84	Chr08	115003522	92
AZ09	56.54	IA04	58.853	c3_00986	D08	62160285	99	Chr04	55322110	98	Chr08	120895561	96
AZ09	59.014	IA04	62.467	ck_45985	D08	62908549	100	Chr04	55974651	99	Chr08	121915683	93
AZ09	74.356	IA04	80.924	c2_51863	D08	67122545	98	Chr04	59586455	96	Chr08	126582169	88
AZ09	84.782	IA04	101.635	GS2D_31703p59q3	D08	68401427	100	Chr04	60765814	100	Chr08	127857210	98
AZ09	95.901	IA04	49.327	GS1D_35048p234q13	D08	69750855	100	Chr04	62002797	100	Chr08	129101147	100
AZ10	0	IA07	29.412	c3_40233	A03	101464731	98	Chr11	56564658	87	Chr03	128611797	98
AZ10	9.268	IA07	38.428	c4_49707	A03	74855022	99	Chr04	15670011	85	Chr03	102059895	98
AZ10	12.341	IA07	18.442	EST2A_00002_034	A03	30730989	100	Chr05	20151675	97	Chr03	49446296	98
AZ10	12.341	IA07	34.491	c4_16854	A03	42676847	99	Chr11	7686098	81	Chr03	71277655	97
AZ10	12.497	IA07	34.813	c4_24463	A03	42138955	99	Chr04	47261540	91	Chr03	70705539	98
AZ10	12.616	IA07	18.876	ck_05459	A03	24566679	100	Chr05	54074129	88	Chr03	56624818	97
AZ10	12.616	IA07	18.876	ck_56835	A03	44894434	100	Chr07	20201788	94	Chr03	32876129	92
AZ10	12.763	IA07	34.115	c4_18565	A03	49735942	100	Chr07	45507022	100	Chr03	80530715	97
AZ10	13.026	IA07	18.879	c2_59292	A03	29799347	99	---	---	---	Chr03	50359811	97
AZ10	13.262	IA07	33.702	c4_44293	A03	23349450	100	Chr03	16537222	92	Chr01	89120255	99
AZ10	13.583	IA07	18.993	ck_104381	A03	53850010	98	Chr12	16730950	82	Chr03	88520922	97
AZ10	14.478	---	---	c4_81753	A03	32894469	99	Chr07	48096741	86	Chr03	76870353	97
AZ10	15.248	IA07	24.478	c4_15143	A03	44500291	99	---	---	---	Chr10	76991838	95
AZ10	19.749	IA07	12.429	c3_28441	A03	11256708	99	Chr03	36203819	87	Chr01	101915560	97
AZ10	23.3	IA07	44.016	c4_57541	A03	7756446	99	Chr03	38736876	91	Chr01	104841655	97
AZ10	37.117	IA07	1.834	GS2A_232535p432q5
AZ10	40.01	IA07	0	EST1A_24254_01_821	D03	48492103	99	Chr03	41825822	99	Chr01	108559571	98
AZ11	0	IA34	5.363	GS2A_29117p378q3	D05	15127472	99	Chr09	13339264	100	Chr05	15997361	99
AZ11	6.916	IA34	0	GS1_48876p1060q15	A05	17185964	100	Chr09	14231127	97	Chr05	17006685	100
AZ11	12.208	IA34	22.015	EST1A_04360	A05	16799827	99	Chr09	13827792	97	Chr05	16601753	99
AZ11	18.115	IA34	30.063	c4_36190	A05	12447798	99	Chr09	10413707	90	Chr05	12437073	99
AZ11	19.235	IA34	11.973	GS2D_4259p2093q25	A05	12695737	100	Chr09	10145729	100	Chr05	12115764	100
AZ12	0	IA28	52.874	EST2_29942	D05	63761721	98	Chr09	70129492	98	Chr05	96222661	91
AZ12	33.012	IA28	26.166	c4_42998	D05	57189137	100	Chr09	51762864	100	Chr05	89605062	96
AZ12	42.054	IA28	15.805	c4_01235	D05	49495035	99	Chr05	34339212	96	---	---	---
AZ12	46.554	IA28	0	c3_76821	D05	32622237	99	Chr09	29461022	98	---	---	---
AZ12	58.608	IA29*	0	EST1D_23510_01	D05	27776136	100	Chr09	24787593	99	Chr05	31054962	98
AZ12	63.931	IA29*	4.038	GS2D_51331p736q38	D05	26606552	100	Chr09	23707140	100	Chr05	29330289	98
AZ12	71.669	IA27**	27.884	EST1D_140374	D05	21529953	98	Chr09	19043922	99	Chr05	23118601	95
AZ12	83.323	---	---	EST2D_20572	---	---	---	---	---	---	---	---	---
AZ12	92.695	IA27**	0	c4_06690	D05	18861200	99	Chr09	16747616	98	Chr05	20276860	97
AZ12	99.225	IA27**	14.083	GS1D_23044p418q14	D05	15583214	100	Chr01	3217978	98	Chr05	16577440	100
AZ12	102.428	IA27**	11.783	c2_04598	D05	14681025	99	Chr09	12930129	89	Chr05	15407053	88
AZ12	123.393	IA27**	45.448	c4_09461	D05	9093352	100	Chr09	8039914	99	Chr05	9785653	90
AZ12	144.541	IA27**	74.339	c4_131801	D05	2523538	98	Chr09	2166392	95	Chr05	2541138	90
AZ13	0	IA10	33.739	EST1D_12_476
AZ13	0.806	IA10	44.971	GS1D_42198p123q14	D01	18992271	100	Chr02	19379907	100	Chr01	26111187	100
AZ13	2.4	IA10	45.383	ck_44780	D01	22818651	98	Chr02	22543888	94	Chr01	41145587	91
AZ13	2.854	IA10	45.898	ck_03349	D01	24549133	100	Chr02	24162849	96	Chr03	92610391	86
AZ13	3.258	IA10	32.482	c4_68957	D01	23137072	99	Chr02	22846290	96	Chr01	40242490	94
AZ13	7.316	IA10	48.265	c2_114573	D01	18196452	99	Chr02	47675389	97	Chr01	85704985	89
AZ13	8.119	IA10	30.591	c4_09583	D01	48538290	98	Chr02	48044564	99	Chr02	60361482	95
AZ13	9.17	IA10	27.497	c4_09232	D01	55175938	99	Chr02	54081099	96	Chr02	87344735	80
AZ13	34.373	IA10	0	c4_21328	D01	62287774	98	Chr02	60809827	97	Chr02	97268239	95
AZ14	0	IA14	80.698	c4_34293	D04	56438319	100	Chr12	35305399	93	---	---	---
AZ14	21.09	IA14	60.677	c4_02071	D04	54098933	100	Chr12	33346252	98	Chr04	2628341	96
AZ14	46.386	IA14	39.264	c2_50716	A02	62208783	87	Chr12	30379826	96	Chr04	5589488	89
AZ14	52.934	IA14	32.796	c4_07752	D04	46078779	99	Chr12	25730113	93	Chr11	70585241	79
AZ14	54.071	IA14	32.126	c4_12071	D04	45724046	99	Chr12	25460472	98	Chr04	86692626	91
AZ14	55.107	IA14	16.251	c4_00820	D04	12443194	99	Chr12	11259510	98	Chr04	82768707	93
AZ14	55.503	IA14	17.053	c2_14014	D04	12364699	99	Chr12	11196125	98	Chr04	82890780	96
AZ14	55.784	IA14	16.353	c3_120507	D04	13781290	98	Chr01	39267770	100	Chr04	81104655	93
AZ14	56.102	IA14	4.566	c4_23248	D04	14579649	99	Chr12	13298816	98	Chr04	78211024	90
AZ14	56.835	IA14	31.084	EST2D_06190	D04	44297972	99	Chr12	24088985	100	Chr04	14306395	99
AZ14	57.548	IA14	29.496	c4_50627	D04	30354820	93	Chr06	26814094	92	Chr11	80581707	90
AZ14	57.555	IA14	29.494	c4_75611	D04	29262880	99	Chr09	55685566	97	Chr10	41983917	87
AZ14	57.81	IA14	29.516	c4_35576	D04	22188575	98	Chr12	19389336	96	Chr05	19924787	91
AZ14	58.28	IA14	29.622	c4_03381	D04	25335412	99	Chr13	53223400	96	Chr04	77427602	88
AZ14	58.494	IA14	26.55	c4_10606	D04	44538095	97	Chr12	24354530	98	Chr04	14759569	79
AZ14	59.079	IA14	19.652	GS1_3305p954q19	D04	41232324	100	Chr09	65387785	100	Chr04	20511939	100
AZ14	59.41	IA14	12.205	cs_173	D04	39704855	99	Chr09	63725487	95	Chr04	24086686	91
AZ14	60.545	IA14	29.494	c4_07561	D04	26366343	100	Chr12	21910533	98	Chr10	61118498	88
AZ14	61.254	---	---	cs_12499	D04	34198635	97	Chr09	58446155	88	Chr04	39579347	87
AZ14	69.458	IA14	0	EST1D_03860	---	---	---	---	---	---	---	---	---
AZ14	78.584	IA14	8.597	c4_25634	D04	3602330	99	Chr12	4182223	99	Chr04	92724301	97
AZ14	84.189	IA14	40.362	c4_07376	D04	4628961	99	Chr12	3997692	98	Chr12	36721160	84
AZ15	0	IA18*	45.817	cs_1288	A11	12955059	100	Chr07	10732504	87	Chr11	111188329	99
AZ15	5.64	IA18*	24.412	c4_26580	A11	10951928	100	Chr08	51061035	90	Chr11	113226464	98
AZ15	29.026	IA18*	0	EST1A_130984	---	---	---	---	---	---	---	---	---
AZ15	34.627	IA17	25.829	ck_07011	scaffold_33	385718	99	Chr10	31113599	83	Chr11	56927158	97
AZ15	35.454	IA17	37.802	c4_68550	A11	53172447	98	---	---	---	Chr11	76307222	98
AZ15	36.246	IA17	38.708	EST1A_00072_04	D11	35553465	100	Chr07	32632408	98	Chr11	67273868	99
AZ15	36.533	IA17	24.801	ck_24378	A11	52698740	99	Chr08	9127108	89	Chr06	61771846	94
AZ15	39.342	---	---	c4_134286	A11	48389338	100	---	---	---	Chr11	74894327	99
AZ15	43.144	IA17	28.971	c4_94051	A11	81127875	99	Chr06	24861817	87	Chr11	31389875	97
AZ15	43.821	IA17	32.782	c4_05495	A11	68627562	100	Chr11	44512951	81	Chr11	46788308	98
AZ15	43.976	IA17	21.622	c4_16509	A11	79145908	99	Chr04	22034085	90	Chr13	13766711	91
AZ15	43.977	IA17	19.678	c4_07089	A11	81524028	99	Chr06	29524630	87	Chr11	77900967	89
AZ15	44.318	IA17	18.912	ck_44145	A11	66564698	99	Chr10	13180227	83	Chr11	43912687	98
AZ15	45.109	---	---	EST1A_22580
AZ15	45.96	IA17	18.003	c3_63275	A11	88680598	98	---	---	---	Chr11	28564780	93
AZ15	49.912	IA17	0	c4_110219	A11	94722588	99	Chr07	46154706	91	Chr11	22893719	93
AZ15	60.453	IA17	11.953	c3_28470	A11	103552230	99	Chr07	51766766	81	Chr11	13538370	98
AZ15	79.995	---	---	c4_47355	A11	109621794	97	Chr06	31747144	89	Chr11	5593536	95
AZ16	0	IA22	56.531	c2_48642	A07	89848877	98	Chr05	20755627	78	Chr07	93242131	98
AZ16	5.241	IA22	71.363	c4_32659	A07	24309913	98	Chr10	12173800	88	Chr07	24316785	96
AZ16	10.441	IA22	74.365	c4_05239	A07	65315590	100	Chr07	20126523	89	Chr01	84150134	90
AZ16	11.637	IA22	77.263	ck_24803	A07	34126828	98	Chr05	38028092	80	Chr07	33705883	97
AZ16	13.339	IA22	60.293	c4_117179	A10	83243828	96	Chr10	38801825	92	Chr11	67614032	95
AZ16	13.793	IA22	75.207	ck_08110	A07	54651076	99	Chr01	35387400	93	Chr07	75251446	99
AZ16	13.876	IA22	60.469	c4_40887	A07	67495873	98	Chr01	38486618	100	Chr07	65794343	96
AZ16	15.632	IA22	72.45	ck_53995	A07	85891142	99	Chr04	12931652	84	Chr07	89164128	97
---	---	IA22	68.737	c4_10256	A07	72792542	100	Chr05	11310473	85	Chr07	71646924	97
AZ16	16.997	IA22	65.156	c4_49169	A07	88161608	99	Chr08	30116102	90	Chr07	91537957	98
AZ16	18.713	IA22	60.608	c4_04889	A07	80660496	99	Chr12	23633198	91	Chr07	83369219	97
AZ16	25.995	IA22	90.533	EST2_39330	---	---	---	---	---	---	---	---	---
AZ16	26.498	IA22	89.129	cs_1083	A07	20614871	97	Chr09	28184186	85	Chr07	19376206	95
AZ16	27.038	IA22	93.811	c2_11322	A07	18377612	100	Chr01	13781664	93	Chr07	16950764	99
AZ16	41.599	IA22	108.209	GS1A_23155p1125q16	A07	7321899	99	Chr01	6569896	98	Chr07	7649993	99
AZ16	77.592	---	---	c4_00014	A07	1830647	100	Chr01	1541265	80	Chr07	1901910	98
AZ17	0	IA22	0	EST1A_00010_17	A07	92681306	100	Chr01	54386401	100	Chr07	96341206	100
AZ17	1.872	IA22	33.072	GS1A_20202p545q14	A07	92795490	100	Chr01	54469289	100	Chr07	96470265	100
AZ17	6.615	IA22	26.949	c3_11606	A07	93171853	99	Chr01	54876595	95	Chr07	96878269	99
AZ18	0	IA08	70.407	GS2A_42831p351q12	A13	96773239	99	Chr13	48549792	94	Chr13	115638132	99
AZ18	6.099	IA08	60.449	c4_19854	A13	92910087	99	---	---	---	Chr13	111453271	94
AZ18	7.625	IA08	60.987	GS1A_40993p488q27	A13	91953172	100	Chr13	47037764	98	Chr13	110366813	99
AZ18	18.388	---	---	c4_52231	A13	60478011	99	---	---	---	Chr13	74778822	97
AZ18	20.01	IA08	30.193	ck_58314	A13	57791457	98	Chr10	54590118	82	Chr13	73694220	97
AZ18	20.163	IA08	44.943	c4_00145	A13	48104977	100	Chr09	24458308	89	Chr13	60341167	99
AZ18	20.179	IA08	48.778	c4_75264	A13	76987698	98	Chr09	35587095	80	Chr13	92251818	95
AZ18	20.324	IA08	43.642	c4_106170	A07	55316551	100	Chr11	37455444	86	Chr13	43953027	97
AZ18	20.326	IA08	44.591	c4_54754	A13	23758508	99	Chr01	50253642	73	Chr13	50758380	98
AZ18	20.44	IA08	42.377	c4_120178	A13	43886148	100	Chr05	28036599	86	Chr13	58730087	96
AZ18	20.593	IA08	44.979	c4_66214	A13	43856575	99	---	---	---	Chr13	58700545	95
AZ18	20.784	IA08	44.618	c4_47547	scaffold_659	30199	99	Chr08	21218178	100	Chr13	51388142	97
AZ18	21.281	IA08	44.39	c4_31345	A13	36343335	98	Chr13	21747977	84	Chr13	34355050	97
AZ18	22.155	IA08	47.331	c4_67821	A13	67092046	87	Chr13	31433662	66	Chr13	82284427	85
AZ18	23.691	IA08	32.496	ck_24841	A13	63541501	99	---	---	---	Chr13	78392359	100
AZ18	27.58	IA08	38.703	c4_40722	A13	9478732	98	---	---	---	Chr08	92656633	88
AZ18	48.809	IA08	0	GS1A_34972p1090q20	A13	3404007	100	Chr13	2279335	100	Chr13	3177991	100
AZ19	0	---	---	c4_05121	A10	6056379	99	Chr03	18854801	92	Chr10	123436926	97
AZ19	1.375	IA15	5.478	c4_30426	A10	6566496	100	Chr11	5496648	99	Chr10	122892955	100
AZ19	9.075	IA15	20.592	c4_74243	A10	19770376	99	Chr11	45583016	92	Chr10	108892403	98
AZ19	10.585	IA15	0	c4_12475	A10	19520926	100	Chr10	20632783	91	Chr05	86583896	85
AZ19	12.431	IA15	3.726	c2_60153	scaffold_598	11803	99	Chr02	44872989	90	Chr10	41055773	98
AZ19	13.379	IA15	4.803	GS1A_34804p1288q26	A10	65019706	100	Chr11	26512830	99	Chr10	83316922	99
AZ19	21.631	IA15	37.525	c4_08951	A10	94778753	99	Chr07	13160674	77	Chr10	22644658	96
AZ19	22.708	IA15	14.816	GS1A_43230p229q17	A10	81143513	100	Chr11	17995282	100	Chr10	100706540	100
AZ19	22.868	IA15	30.594	c4_125389	A10	76939129	99	---	---	---	Chr10	96305945	98
AZ19	23.109	IA15	31.532	c4_18411	A10	80917210	100	Chr11	18174407	94	Chr10	100411456	98
AZ19	23.113	IA15	14.196	c3_35478	A10	80806711	98	Chr12	5982992	100	Chr10	100299930	96
AZ19	23.718	IA15	30.925	c4_20421	A10	78579634	100	Chr09	33095357	82	Chr10	97700925	98
AZ19	24.606	IA15	17.112	GS1A_32899p478q21	A10	90147914	99	Chr11	45788977	99	Chr10	28957841	100
AZ19	26.76	IA15	9.165	c4_28291	A10	70245846	100	Chr11	23423522	92	Chr10	88719026	98
AZ19	29.671	IA15	40.507	c4_48164	A10	98555505	99	---	---	---	Chr10	18387718	97
AZ19	47.339	IA15	56.276	c4_26223	A10	106114506	100	Chr11	55426932	85	Chr10	8365203	99
AZ20	0	IA23	86.288	c4_09929	D09	40676126	99	Chr06	39588381	94	Chr09	70527552	93
AZ20	19.024	IA23	49.963	c3_66591	D09	35133574	99	Chr06	34575333	98	---	---	---
AZ20	26.96	IA23	56.899	c4_101926	D08	38621634	91	Chr06	20664857	90	Chr09	48724659	89
AZ20	29.722	IA23	40.695	ck_77717	D09	29614432	98	Chr06	29637024	96	Chr07	53248992	84
AZ20	30.09	IA23	39.162	c2_10958	D09	15836406	100	Chr06	14893309	98	Chr08	26126044	92
AZ20	30.721	IA23	39.013	ck_03448	D09	12968385	99	Chr06	12357527	95	Chr04	31989790	84
AZ20	30.985	IA23	55.716	c4_51260	D09	12451928	99	Chr06	11846172	99	---	---	---
AZ20	34.874	IA23	35.148	c4_54518	D09	9858730	99	Chr06	9370171	96	Chr13	60831114	87
AZ20	36.161	IA23	33.605	GS1D_53810p1475q16	D11	7197014	98	Chr07	6479663	97	Chr09	9359318	100
AZ20	46.305	IA23	23.309	ck_57041	D09	5404574	100	Chr06	4992662	94	Chr09	4547419	91
AZ20	48.114	IA23	22.426	c2_03579	D09	3971337	99	Chr06	4087404	98	Chr09	3675138	88
AZ20	49.743	IA23	21.25	c2_67586	D09	3506029	99	Chr06	3581336	94	Chr04	38108699	88
AZ20	53.967	IA23	15.638	EST1D_30997_01_542	D09	2151800	97	Chr06	2180346	100	Chr09	3231196	93
AZ20	54.656	IA23	3.977	EST1D_12374	D09	1970314	99	Chr06	2008620	100	Chr09	1941766	95
AZ20	57.991	IA23	0	c4_15967	D09	1234789	100	Chr06	1277170	97	Chr09	1212361	93
AZ21	0	IA20	7.662	c4_46170	D07	48192327	100	Chr01	42557551	95	Chr04	85886877	88
AZ21	5.397	IA20	0	c4_16632	D07	46471967	97	Chr01	41063378	94	Chr07	80695017	83
AZ21	7.008	IA20	1.66	EST1D_87583	---	---	---	---	---	---	---	---	---
AZ21	8.937	IA20	15.863	c2_28117	D07	30241202	99	Chr01	29328346	95	Chr07	44275941	89
AZ21	10.23	IA20	16.07	GS1_41582p272q16	D07	28617210	100	Chr01	27803927	100	Chr07	40963695	100
AZ21	16.144	IA20	20.652	c2_14514	D07	22166613	99	Chr01	20827695	95	Chr01	28737638	84
AZ21	21.176	IA20	23.28	ck_75214	D07	18304091	99	Chr01	17098358	96	Chr07	22851431	91
AZ21	24.771	IA20	39.598	GS2A_20396p609q3	D07	18817828	100	Chr01	17535837	100	Chr07	23639342	100
AZ21	31.22	---	---	GS2D_35645p625q31	D07	11890417	100	Chr01	11296670	100	Chr11	106429027	83
AZ21	46.967	---	---	c2_89198	D07	5155281	100	Chr01	4716720	91	Chr07	5464813	92
AZ22	0	IA21	0	EST2_13554_870	---	---	---	---	---	---	---	---	---
AZ22	8.929	IA21	38.18	c4_00098	D07	55696530	100	Chr01	53142294	92	Chr09	69955624	80
AZ22	13.055	IA21	30.81	c4_14630	D07	55033970	99	Chr01	52580785	92	Chr07	94262144	88
AZ23	0	IA19	85.909	c4_37895	A08	2877637	99	Chr04	2935237	89	Chr08	3010342	97
AZ23	17.815	IA19	62.616	c4_47288	A08	8197642	99	Chr04	7141907	94	Chr08	9231249	99
AZ23	21.475	IA19	50.295	c2_22276	A08	12853890	100	Chr04	9711303	89	Chr08	14129276	96
AZ23	25.648	IA19	42.642	c4_34400	A08	92498286	99	Chr13	30565368	86	Chr08	95869345	98
AZ23	27.585	IA19	46.568	c4_05939	A08	96624755	100	Chr13	15772175	91	Chr08	100407132	97
AZ23	31.228	IA19	34.239	c2_02349	scaffold_4853	208	94	Chr04	45918727	92	Chr08	106427182	99
AZ23	31.898	IA19	34.954	c4_21262	A08	101773196	99	Chr04	45600186	91	Chr08	105821546	99
AZ23	40.663	IA19	4.626	c4_29690	A08	110712136	100	Chr04	51359632	92	Chr08	114895363	98
AZ23	50.384	IA19	21.792	GS2D_28817p642q3	A08	116767583	100	Chr04	55846828	100	Chr08	121657108	100
AZ23	56.504	IA19	0	c4_44618	A08	117527721	99	Chr04	56330057	90	Chr08	122416102	98
AZ24	0	---	---	c4_09464	A09	2580082	98	Chr06	2237893	90	Chr09	3291090	98
AZ24	35.121	IA05	56.157	c2_06367	A09	43837880	99	Chr06	21115134	94	Chr09	47393776	98
AZ24	35.655	IA05	56.404	GS2A_33155p425q9	A09	15659999	100	Chr06	11402762	97	Chr09	16620045	100
AZ24	40.15	IA05	45.943	EST1A_07380_01	A09	54005167	100	Chr06	30403003	98	Chr09	58682216	99
AZ24	54.232	IA05	37.229	c4_75610	A09	60158387	99	Chr06	34135395	89	Chr09	62386765	98
AZ24	60.944	IA05	31.395	c4_53534	A09	62620990	100	Chr01	20633907	88	Chr09	65117997	98
AZ24	63.021	IA05	17.704	c3_37342	A09	62042708	99	Chr10	6859104	82	Chr09	64499248	97
AZ24	68.075	IA05	25.181	c4_38063	A09	64760080	100	Chr06	37143678	87	Chr09	67034250	99
AZ24	77.366	IA05	0	ck_52689	A09	68183125	97	Chr06	39690223	98	Chr09	70636942	98
AZ24	80.581	IA05	1.485	EST2A_44292	---	---	---	---	---	---	---	---	---
AZ24	98.733	IA05	35.762	GS1A_33747p375q14	A09	75848634	100	Chr06	45808909	100	Chr09	78495055	100
AZ24	123.233	---	---	c4_08158	A09	79333397	100	Chr06	48945763	92	Chr09	82484752	97
AZ25	0	IA12	22.013	GS1A_41016p474q13	A02	326615	95	Chr05	368918	100	Chr03	330619	93
AZ25	7.971	IA12	0	EST2_46820_446	---	---	---	---	---	---	---	---	---
AZ25	34.944	IA11	47.874	ck_09867	A02	3870558	98	Chr05	4003057	95	Chr03	4027119	97
AZ25	49.006	IA11	23.215	c4_61975	A02	8247114	100	Chr05	6829039	84	Chr03	8537081	99
AZ25	53.045	---	---	c2_39361	A02	9133383	99	---	---	---	Chr03	9581384	100
AZ25	57.443	IA11	11.846	c4_39999	A02	17185377	100	Chr05	12950864	87	Chr03	18379520	99
AZ25	58.34	IA11	13.342	EST1A_8560	---	---	---	---	---	---	---	---	---
AZ25	61.089	IA11	17.783	c4_12325	A02	9482568	100	Chr08	50883912	90	Chr03	9942269	99
AZ25	68.883	IA11	3.542	c4_71167	A02	81561800	99	Chr03	6247709	96	Chr02	6818816	99
AZ25	71.589	IA11	0	c4_54340	A02	84855696	99	Chr09	22206694	93	Chr02	10712388	99
AZ25	72.728	IA11	0.339	c4_27824	A02	84529808	100	Chr03	8168399	96	Chr02	9734025	100
AZ26	0	IA09	15.558	EST1D_01778
AZ26	1.242	IA09	13.102	c4_11191	D13	11655805	99	Chr13	10775730	97	Chr13	14420477	92
AZ26	2.847	IA09	11.52	c4_18034	D13	17722699	95	Chr13	16518004	93	---	---	---
AZ26	3.332	IA09	24.507	c3_01023	D13	17703717	100	Chr13	16499345	97	Chr13	35289770	90
AZ26	4.968	IA09	26.029	c2_79759	D13	35245135	100	Chr13	30156371	98	Chr09	14702821	85
AZ26	5.475	IA09	9.793	c4_00395	D13	36334366	99	Chr05	39688721	86	Chr10	24498799	100
AZ26	7.719	IA09	8.37	c4_39365	D13	41704276	99	Chr13	36533240	97	Chr13	91671752	85
AZ26	12.834	IA09	3.795	c4_63317	D13	52788761	99	Chr13	46387889	96	Chr13	109568909	87
AZ26	14.674	IA09	31.026	c2_56351	D13	53769852	99	Chr10	19802100	65	---	---	---
AZ26	21.774	IA09	0	c4_43125	D13	58413467	99	Chr13	52066036	99	Chr13	117247428	96
AZ26	23.676	IA09	34.645	c2_58393	D13	58115513	99	Chr13	51808765	98	---	---	---
AZ27	0	IA33	5.653	c3_96157	D02	12742894	100	Chr05	11219783	99	Chr03	14491437	93
AZ27	1.59	IA33	19.189	c4_28721	D02	15109747	99	Chr05	13477081	97	Chr03	17970945	91
AZ27	1.748	IA33	6.729	c2_52817	D02	15645632	100	Chr05	13939801	97	Chr03	20183179	90
AZ27	2.086	IA33	21.168	c4_13201	D02	21705574	100	Chr05	19241443	98	Chr03	53012541	95
AZ27	2.484	IA33	20.796	c4_58196	D02	27966867	99	Chr05	24893816	87	Chr02	26644086	86
AZ27	3.484	IA33	21.893	c4_39031	D02	45201940	98	Chr05	39861469	94	Chr03	92551839	89
AZ27	4.302	IA33	23.269	c4_00223	D02	50612377	99	Chr05	44540026	99	Chr03	103466077	93
AZ27	9.294	IA33	23.736	c4_43075	D02	61010129	97	Chr05	54483913	96	Chr03	122670520	93
AZ27	10.074	IA33	0	GS2D_35199p530q21	D02	59849786	99	Chr05	53360147	100	Chr03	120649409	100
AZ28	0			c4_54008	D03	11696845	99	Chr03	11267660	95	Chr11	33505247	89
AZ28	6.639	IA36	25.392	c4_42671	D03	6483364	98	Chr03	6195916	96	Chr02	6900313	93
AZ28	11.78	IA36	46.278	GS1D_40185p764q19	D03	17553860	99	Chr02	5931327	99	Chr02	19851565	100
AZ28	13.009	IA36	24.248	c4_42065	D03	25419226	100	Chr03	24100607	97	Chr01	45596348	100
AZ28	27.341	IA36	5.848	c4_52610	D03	47575215	97	Chr03	41036491	78	Chr01	107636691	89
AZ28	33.04	IA36	0	c4_00832	D03	48393682	99	Chr03	41726174	97	Chr01	108634035	90
AZ28	44.907			GS2A_31261p665q3	D03	50172131	99	Chr03	43260593	100	Chr01	110506820	98
AZ29	8.23	IA13	29.63	GS2D_29961p594q4	D13	62947661	100	Chr13	56974764	100	Chr13	122467623	100
AZ29	8.23	IA13	29.63	GS2D_29961p594q4	A13	102997877	100	---	---	---	---	---	---
AZ30	0	IA24	0	c4_78149	A01	100276588	99	Chr02	59824585	89	Chr02	95693956	98
AZ30	16.772	IA24	29.345	c4_26482	A01	93023308	98	Chr01	20821923	88	Chr02	87941531	97
AZ30	18.457	---	---	ck_44567	A01	80571420	100	---	---	---	Chr02	79592120	97
AZ30	21.762	IA24	26.934	c4_48693	scaffold_238	101677	97	---	---	---	---	---	---
AZ30	21.921	IA24	26.921	c4_08921	A01	61822969	100	Chr02	8690444	86	Chr01	72725855	97
AZ30	21.989	IA24	26.758	c4_09740	A11	29775242	85	Chr10	29260621	81	Chr02	29797606	86
AZ30	22.185	IA24	44.222	c2_38857	A01	65148434	99	Chr06	26958800	87	Chr01	74606917	97
AZ30	22.247	IA24	25.74	c4_66700	scaffold_88	37602	99	---	---	---	Chr02	68220418	96
AZ30	22.351	IA24	44.415	c3_05004	A01	65638491	97	Chr05	15240935	84	Chr05	42622636	96
AZ30	22.363	IA24	26.639	c4_77850	A01	65663929	99	Chr03	7242355	91	Chr05	42652959	99
AZ30	23.964	IA24	28.65	c4_73990	A01	91683592	99	Chr02	53496914	93	Chr02	86456635	99
AZ30	32.201	IA24	17.172	c4_10335	A01	17216853	98	Chr02	14044618	94	Chr07	20846907	95
AZ30	37.69	IA24	66.121	EST1A_32413_01	D01	9924895	100	Chr02	11395834	98	Chr01	13043326	96
AZ30	40.855	IA24	8.961	c4_01365	A01	11419465	99	Chr02	10539211	89	Chr01	12030839	98
AZ30	50.545	IA24	62.431	c4_127304	A01	5854152	98	---	---	---	Chr10	38133782	97
AZ30	61.506	IA24	84.826	GS1_37852p566q20	A01	4271138	99	Chr02	2986178	99	Chr01	3402122	99
AZ31	0	IA31	10.57	EST1D_18263	---	---	---	---	---	---	---	---	---
AZ31	9.685	IA31	0.982	ck_15073	D06	64706607	96	Chr10	58893548	94	Chr06	127134575	91
AZ31	10.569	IA31	0	EST1D_32193_01	D06	64629885	100	Chr10	58811643	99	Chr06	127032311	94
AZ31	13.762	IA31	18.39	M626	---	---	---	---	---	---	---	---	---
AZ31	14.575	IA31	18.605	M51	---	---	---	---	---	---	---	---	---
AZ31	17.081	IA31	21.303	EST1D_09108_01	D06	63103230	98	---	---	---	Chr06	124929944	94
AZ31	24.838	IA31	32.551	c4_10294	D06	59056448	100	Chr10	53457973	93	Chr07	15084458	85
AZ31	26.844	IA31	45.715	EST1D_14_1412	---	---	---	---	---	---	---	---	---
AZ31	29.132	IA31	34.038	c4_65202	D06	57362695	99	Chr10	51711481	95	Chr06	116480704	92
AZ31	34.861	IA31	38.284	EST1D_42236	---	---	---	---	---	---	---	---	---
AZ32	0	IA30	27.745	c4_68073	D10	13976894	100	Chr11	12623789	96	Chr05	37487605	88
AZ32	1.83	IA30	24.535	GS1_11360p399q15	D10	21883853	100	Chr11	20200386	100	Chr10	93982836	100
AZ32	1.964	IA30	24.052	ck_07710	D10	22459096	100	Chr11	20872428	90	Chr08	104613900	84
AZ32	2.911	IA30	37.76	c4_38839	D10	22991955	99	Chr11	21382121	96	Chr10	92207915	88
AZ32	3.929	IA30	39.365	c4_06280	D10	25433293	100	Chr11	23637611	99	Chr10	88427209	98
---	---	IA30	19.713	c4_54688_43.423	D10	41254122	98	Chr11	38359622	94	Chr10	46722819	90
AZ32	4.82	IA30	21.308	ck_51389	D10	37165699	99	Chr11	34494359	98	Chr10	65200096	82
AZ32	6.203	IA30	41.767	c4_47698	D10	47388641	98	Chr11	43294679	94	---	---	---
AZ32	12.097	IA30	14.502	ck_01124	D10	56943517	98	Chr11	52297091	97	Chr10	16750175	92
AZ32	14.879	IA30	47.321	c4_103648	D10	57823475	98	Chr11	52958403	91	Chr10	14364146	93
AZ32	29.754	IA30	29.715	c4_35467	D10	60976147	99	Chr11	56058610	97	Chr10	9569998	92
AZ32	39.059	IA30	0	GS1D_35377p470q22	D10	62550932	97	Chr11	57548165	97	Chr10	7755291	100
AZ33	0	IA32	15.788	c4_120767	A04	75497922	98	---	---	---	Chr04	7016321	92
AZ33	1.443	IA32	0	c2_14224	A04	72453289	100	---	---	---	Chr04	10570856	97
AZ33	6.948	IA32	6.454	GS2A_30957p652q17	A04	18621833	100	Chr12	21183431	97	Chr04	55083583	100
AZ33	6.958	IA32	22.739	c4_06113	A04	48679431	99	Chr09	59478729	87	Chr04	33357139	97
AZ33	7.159	IA32	23.89	c4_28198	A04	40696893	97	---	---	---	Chr04	35709718	96
AZ33	7.91	IA32	5.933	c2_03553	A04	17716144	99	Chr05	41090896	100	Chr04	51099202	100
AZ33	11.856	IA32	26.302	c4_57783	A04	16201244	99	Chr02	26106060	100	Chr05	67277271	97
AZ33	27.436	IA32	40.514	EST1A_21911	---	---	---	---	---	---	---	---	---
AZ33	30.393	IA32	10.26	GS2A_52376p385q16	A04	4800624	99	Chr09	67611717	96	Chr05	92283115	99
AZ33	58.543	IA32	71.631	c4_132881	A04	807278	99	Chr09	69906386	92	Chr05	96085348	91
AZ34	0	IA35	0	c4_09008	D13	1182162	99	Chr13	922569	92	Chr13	1348155	89
AZ34	5.011	IA35	0.409	EST2_16603	---	---	---	---	---	---	---	---	---
